# Supplementary material for: Lysophosphatidylcholine Regulates Sexual Stage Differentiation in the Human Malaria Parasite Plasmodium falciparum
Source: PubMed Central journal article supplement (PMC5733390; doi:10.1016/j.cell.2017.10.020), 2017-12-14
Supplement: mmc1.pdf [file mmc1.pdf]

**Supplemental Information**

**Lysophosphatidylcholine Regulates Sexual**

**Stage Differentiation in the Human Malaria**

**Parasite *Plasmodium falciparum***

Nicolas M.B. Brancucci, Joseph P. Gerdt, ChengQi Wang, Mariana De Niz, Nisha Philip, Swamy R. Adapa, Min Zhang, Eva Hitz, Igor Niederwieser, Sylwia D. Boltryk, Marie-Claude Laffitte, Martha A. Clark, Christof Grüning, Deepali Ravel, Alexandra Blancke Soares, Allison Demas, Selina Bopp, Belén Rubio-Ruiz, Ana Conejo-Garcia, Dyann F. Wirth, Edyta Gendaszewska-Darmach, Manoj T. Duraisingh, John H. Adams, Till S. Voss, Andrew P. Waters, Rays H.Y. Jiang, Jon Clardy, and Matthias Marti

Supplementary Table S1. Related to STAR Methods Details sections “Generation of CRISPR9/Cas9 and donor plasmids” and “Parasite transfection and selection”.

Oligonucleotides used in this study.

| <b>Name</b>  | <b>Direction</b> | <b>Sequence (5'-3')</b>                       |
|--------------|------------------|-----------------------------------------------|
| sgt_ap2g3'_F | F                | TATTAGTTATAGGGAATATTCAA                       |
| sgt_ap2g3'_R | R                | AAACTTTGAATATTCCCTATAACT                      |
| PCRA_F       | F                | CTGGCGTAATAGCGAAGAGG                          |
| PCRA_R       | R                | CATTAATGAATCGGCCAACG                          |
| PCRB_F       | F                | CGTTGGCCGATTCATTAATGGATGCTACCATAACATTTAATAACC |
| PCRB_R       | R                | ACTCATACCTGCGGATCCAATATTCCTGTTGTTTCCCC        |
| PCRC_F       | F                | ATTGGATCCGCAGGTATGAGTAAAGGAGAAGAAGAACTTTTC    |
| PCRC_R       | R                | ATAGGGAATATTCAAATCATTGTATAGTTCATCCATG         |
| PCRD_F       | F                | AATGATTTTGAATATTCCCTATAACTAAATG               |
| PCRD_R       | R                | CCTCTTCGCTATTACGCCAGCTGTGTGTTGAGAAATTTAAAG    |
| ap2F         | F                | GGTAATGATGGTGCATTGAG                          |
| ap2R         | R                | GTACAACAAAACTGAACTC                           |
| gfpF         | F                | GGTTATGTACAGGAAAGAAC                          |
| gfpR         | R                | GTGTGAGTTATAGTTGTATTCC                        |
